# Supplementary material for: The N, P co-doped carbon-loading Ni3P@Ni heterojunction nanocomposites derived from polybenzimidazoles grafted with oxygen-phosphorus group as high-efficiency electrocatalyst for oxygen evolution reaction
Source: Royal Society of Chemistry journal article supplement (doi:10.1039/d3ta05422e), 2023-01-01
Supplement: d3ta05422e1.pdf [file d3ta05422e1.pdf]

**The N, P co-doped carbon-loading Ni<sub>3</sub>P@Ni heterojunction nanocomposites derived from polybenzimidazoles grafted with oxygen-phosphorus group as high-efficiency electrocatalyst for oxygen evolution reaction**

Gang Wang<sup>1\*</sup>, Wenshuai Tang<sup>1</sup>, Shuai Yang<sup>1</sup>, Mingxia Lu<sup>1</sup>, Hongliang Wei<sup>1</sup>, Lifeng Cui<sup>2\*</sup> and Xiaodong Chen<sup>3\*</sup>

<sup>1</sup> College of Chemistry and Chemical Engineering, Henan University of Technology, Zhengzhou 450001, PR China

<sup>2</sup> College of Smart Energy, Shanghai Jiao Tong University, Shanghai 200240, PR China

<sup>3</sup> *Department of Mechanical Engineering, City University of Hong Kong, Tat Chee Avenue, Kowloon, Hong Kong SAR, China.*

## Figure captions

**Figure S1.** The synthetic route of PBI-OP.

**Figure S2.** TG curves of Ni/PBI-OP precursor.

**Figure S3.** The pore size distribution curves of PBI-OP, Ni<sub>3</sub>P@Ni/CNP-L, Ni<sub>3</sub>P@Ni/CNP-M and Ni<sub>3</sub>P@Ni/CNP-H.

**Figure S4.** Magnified SEM images of Ni/PBI-OP.

**Figure S5.** (a) TEM image and (b) HRTEM images of PBI-OP.

**Figure S6.** (a) TEM image and (b) HRTEM images of Ni/PBI-OP Precursor.

**Figure S7.** Magnified SEM images of (a) Ni<sub>3</sub>P@Ni/CNP-L and (b) Ni<sub>3</sub>P@Ni/CNP-H.

**Figure S8.** AFM image of (a) Ni<sub>3</sub>P@Ni/CNP-L, (b) Ni<sub>3</sub>P@Ni/CNP-M, (c) Ni<sub>3</sub>P@Ni/CNP-H, and height contour at the red dashed line of (d) Ni<sub>3</sub>P@Ni/CNP-L, (e) Ni<sub>3</sub>P@Ni/CNP-M and (f) Ni<sub>3</sub>P@Ni/CNP-H.

**Figure S9.** (a) TEM image, (b) HRTEM images of Ni<sub>3</sub>P@Ni/CNP-L.

**Figure S10.** (a) TEM image, (b) HRTEM images of Ni<sub>3</sub>P@Ni/CNP-H.

**Figure S11.** (a) XPS survey, (b) C1s, (c) N1s, (d) Ni2p, (e) O1s, and (f) P2p spectrums of Ni<sub>3</sub>P@Ni/CNP-L.

**Figure S12.** (a) XPS survey, (b) C1s, (c) N1s, (d) Ni2p, (e) O1s, and (f) P2p spectrums of Ni<sub>3</sub>P@Ni/CNP-H.

**Figure S13.** The XPS (a) C1s, (b) N1s, (c) O1s and (d) P2p spectrum of PBI-OP.

**Figure S14.** In real electrolytic cell Ni<sub>3</sub>P@Ni /CNP electrocatalyst.

**Figure S15.** CV curves of (a) PBI-OP, (b) Ni<sub>3</sub>P@Ni/CNP-L, (c) Ni<sub>3</sub>P@Ni/CNP-M and (d) Ni<sub>3</sub>P@Ni/CNP-H.

**Figure S16.** XRD pattern of Ni<sub>3</sub>P@Ni/CNP-M after 48h test.

**Figure S17.** TEM of Ni<sub>3</sub>P@Ni/CNP-M after 48h test.

**Figure S18.** (a) XPS survey, (b) Ni2p, (c) C1s, (d) N1s, (e) O1s, and (f) P2p spectrums of Ni<sub>3</sub>P@Ni/CNP-M after 48h test.

**Figure S19.** CV curves in 1M KOH before and after addition of 1 M CH<sub>3</sub>OH of (a) PBI-OP, (b) Ni<sub>3</sub>P@Ni/CNP-L and (c) Ni<sub>3</sub>P@Ni/CNP-H.

**Figure S20.** The optimized structure of Ni<sub>3</sub>P@Ni, side view(left); top view(right). (Lattice parameters  $a = 9.44 \text{ \AA}$ ,  $b = 12.66 \text{ \AA}$ ,  $c = 27.30 \text{ \AA}$ ,  $\alpha = 90^\circ$ ,  $\beta = 90^\circ$ ,  $\gamma = 90^\circ$ ).

**Figure S21.** The optimized structure of IrO<sub>2</sub>, side view(left); top view(right). (Lattice parameters  $a = 9.56 \text{ \AA}$ ,  $b = 12.82 \text{ \AA}$ ,  $c = 23.87 \text{ \AA}$ ,  $\alpha = 90^\circ$ ,  $\beta = 90^\circ$ ,  $\gamma = 90^\circ$ ).

## Table captions

**Table S1.** The surface area, total pore volume and pore size of PBI-OP, Ni<sub>3</sub>P@Ni/CNP-L, Ni<sub>3</sub>P@Ni/CNP-M, and Ni<sub>3</sub>P@Ni/CNP-H.

**Table S2** Elemental and ICP-OES analyses of Ni<sub>3</sub>P@Ni/CNP sample.

**Table S3.** The XPS peak separation ratio of N1s for Ni<sub>3</sub>P@Ni/CNP-L, Ni<sub>3</sub>P@Ni/CNP-M, and Ni<sub>3</sub>P@Ni/CNP-H.

**Table S4.** Comparison of electrocatalytic OER activities of Ni<sub>3</sub>P@Ni/CNP-M with similar state-of-the-art OER electrocatalysts.

**Table S5** Elemental and ICP-OES analyses of Ni<sub>3</sub>P@Ni/CNP-M before and after 48h test.

**Table S6.** EIS fitting parameters to the equivalent electric circuit for the OER.

**DFT calculation:** Density generalized function theory (DFT) calculations were performed using the firstness principle <sup>[1]-[2]</sup> in the generalized gradient approximation (GGA) using the Perdew-Burke-Ernzerhof (PBE) formulation <sup>[3]</sup>. We choose the projected augmented wave (PAW) potential <sup>[4][5]</sup> to describe the ionic nuclei, while the plane wave base set with a kinetic energy cutoff of 450 eV was used to consider the valence electrons. Van der Waals interactions were considered using grime's DFT-D3 method <sup>[6][7]</sup>. When the energy change was less than  $10^{-5}$  eV, the electron energy was considered self-consistent. The geometric optimization was considered convergent when the energy change was less than 0.02 eV  $\text{\AA}^{-1}$ . The Brillouin region integration was performed in Gamma k point grid 0.04  $\text{\AA}^{-1}$  to optimize the lattice size and geometry. To eliminate artificial effects between periodic images, A 15  $\text{\AA}$  vacuum layer was added to the surface. The spin polarization was calculated.

Using the computational hydrogen electrode (CHE) model developed by Nørskov et al. <sup>[8]</sup>, we established an adsorption model to calculate the Gibbs free energy of oxygen evolution reaction (OER). The reaction mechanism of OER was as follows <sup>[9][10]</sup>:

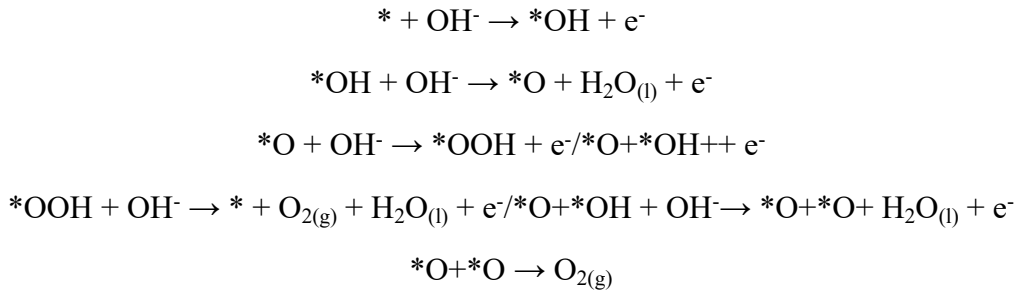

where \* indicated the bare surface. The free energy change was defined as follow:  $\Delta G = \Delta E + \Delta E_{\text{zpe}} - T\Delta S + \Delta G_{\text{pH}} - eU$ , where  $\Delta E$ ,  $\Delta E_{\text{zpe}}$  and  $\Delta S$  represented the difference of total energy, zero-point energy, and entropy between products and reactants for all elementary reactions. The value of  $\Delta G_{\text{pH}}$  was 0.828 eV at pH=14 according to  $\Delta G_{\text{pH}} = -kBT \ln[\text{H}^+]$ . U and e were the electrode potential and transferred charge, respectively. The entropies of the free molecule  $\text{H}_2\text{O}$  were referenced to the NIST database<sup>[10]</sup>. Meanwhile, we obtained the free energy of  $\text{O}_2$  by the equation of  $G(\text{O}_2) = 4.92 + 2G(\text{H}_2\text{O}) - 2G(\text{H}_2)$ , due to the bad description of magnetism of  $\text{O}_2$  in VASP.

## References

- [1] G. Kresse, J. Furthmüller, Efficiency of ab-Initio total energy calculations for metals and semiconductors using a plane-wave basis, *Set. Comput. Mater. Sci.* 6 (1996) 15–50.
- [2] G. Kresse, J. Furthmüller, Efficient iterative schemes for Ab initio total-energy calculations using a plane-wave basis, *Set. Phys. Rev. B* 54 (1996) 11169–11186.
- [3] J.P. Perdew, K. Burke, M. Ernzerhof, Generalized gradient approximation made, *Simple. Phys. Rev. Lett.* 77 (1996) 3865–3868.
- [4] G. Kresse, D. Joubert, From ultrasoft pseudopotentials to the projector augmented-wave method, *Phys. Rev. B* 59 (1999) 1758-1775.
- [5] P.E. Blöchl, Projector augmented-wave method, *Phys. Rev. B* 50 (1994) 17953-17979.
- [6] S. Grimme, J. Antony, S. Ehrlich, H. Krieg, A consistent and accurate ab initio parametrization of density functional dispersion correction (DFT-D) for the 94 elements H-Pu, *J. Chem. Phys.* 132, (2010) 154104.
- [7] S. Grimme, S. Ehrlich, L. Goerigk, Effect of the damping function in dispersion corrected density functional theory, *J. Comput. Chem.*, 2011, 32, 1456-1465.
- [8] E. Skúlason, G.S. Karlberg, J. Rossmeisl, T. Bligaard, J. Greeley, H. Jónsson, J.K. Nørskov, Density functional theory calculations for the hydrogen evolution reaction in an electrochemical double layer on the Pt(111) electrode, *Phys. Chem. Chem. Phys.* 9 (2007) 3241-3250.
- [9] M. Plevová, J. Hnát, K. Bouzek, Electrocatalysts for the oxygen evolution reaction in alkaline and neutral media. A comparative review, *J. Power Sources* 2021, 230072.
- [10] C. Hu, L. Zhang, J. Gong, Recent progress made in the mechanism comprehension and design of electrocatalysts for alkaline water splitting, *Energy Environ. Sci.* 12 (2019) 2620-2645.

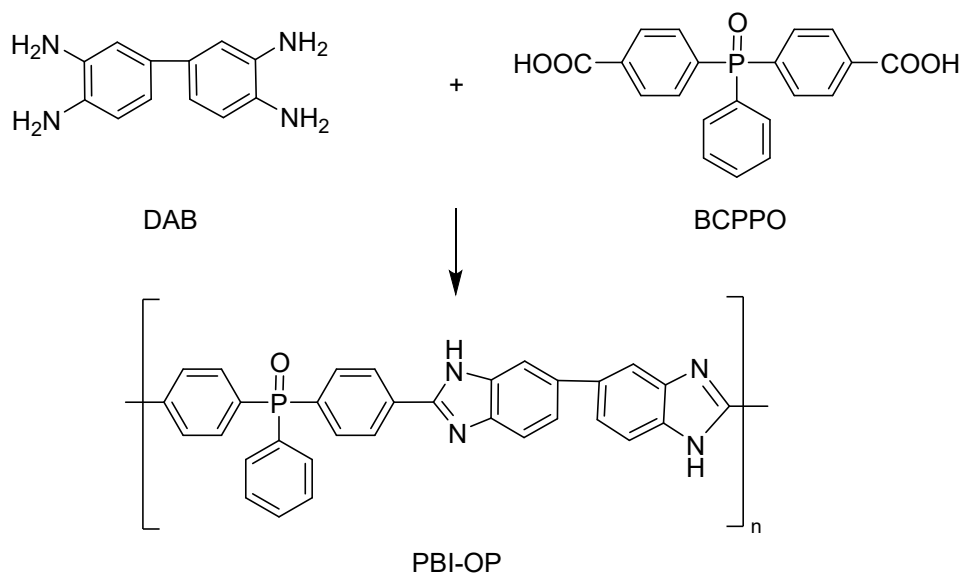

**Figure S1.** The synthetic route of PBI-OP.

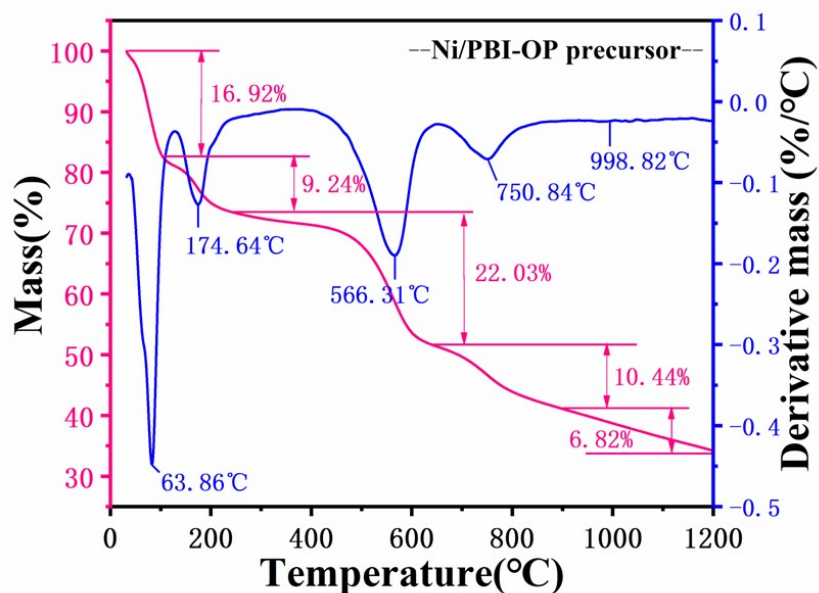

**Figure S2.** TG curves of Ni/PBI-OP precursor.

The TG/DTA curves of Ni/PBI-OP precursor in N<sub>2</sub> atmosphere were exhibited in Figure S2. The whole weight loss process could be divided into five processes. The weight loss of 16.92% at 63.86°C was due to the removal of free water from the sample, and the second weight loss occurred at 174.64°C due to the loss of bound water in the sample ( $\text{NiCl}_2 \cdot 6\text{H}_2\text{O} \rightarrow \text{NiCl}_2 + 6\text{H}_2\text{O}$ ) with a loss of 9.24% by weight<sup>[1]</sup>. A third weight loss was recorded at 566.31°C because the main chain of the PBI-OP polymer was broken down at high temperature<sup>[2-4]</sup>, both Ni and Ni<sub>3</sub>P are generated, and a total of 22.03% of weight was lost in this stage. The fourth weight loss was 10.44%, which occurs at 750.84°C. The reason was that Ni<sub>3</sub>P will decompose into Ni with the increase of temperature<sup>[5]</sup>, and CNP material would also be further decomposed. The last weight loss (6.82%) was recorded at 998.82°C, which was due to the oxidation of low-valence Ni<sub>3</sub>P to high-valence Ni<sub>5</sub>P<sub>4</sub> at high temperature<sup>[6]</sup>.

## Reference

- [1] J.N. Charles, N.D. Deshpande, D.A. Deshpande, Dehydration of  $\text{NiCl}_2 \cdot 6\text{H}_2\text{O}$ , THERMOCHIMICA ACTA (2001).
- [2] G. Wang, G. Xiao, D. Yan, Synthesis and properties of soluble sulfonated polybenzimidazoles derived from asymmetric dicarboxylic acid monomers with



- sulfonate group as proton exchange membrane, *Journal of Materials Science* 369(1-2) (2011) 388-396.
- [3] G. Wang, S. Yang, M. Lu, B. Hua, Z. Zhang, J. Kang, W. Tang, H. Wei, L. Cui, X. Chen, Sulfonated polybenzimidazole engineering defect-induced N, S-codoped carbon-supported Co<sub>3</sub>C hybrid composite as high-efficiency electrocatalyst for oxygen evolution reaction, *Electrochimica Acta* 443 (2023) 141939.
- [4] G. Wang, Y. Yao, G. Xiao, D. Yan, Novel sulfonated polybenzothiazoles with outstanding dimensional stability for proton exchange membranes, *Journal of Membrane Science* 425-426 (2013) 200-207.
- [5] G. Shi, J. Shen, New synthesis method for nickel phosphide nanoparticles: solid phase reaction of nickel cations with hypophosphites, *Journal of Materials Chemistry* 19(16) (2009) 2295-2297.
- [6] Q. Guan, W. Li, M. Zhang, K. Tao, Alternative synthesis of bulk and supported nickel phosphide from the thermal decomposition of hypophosphites, *Journal of Catalysis* 263(1) (2009) 1-3.

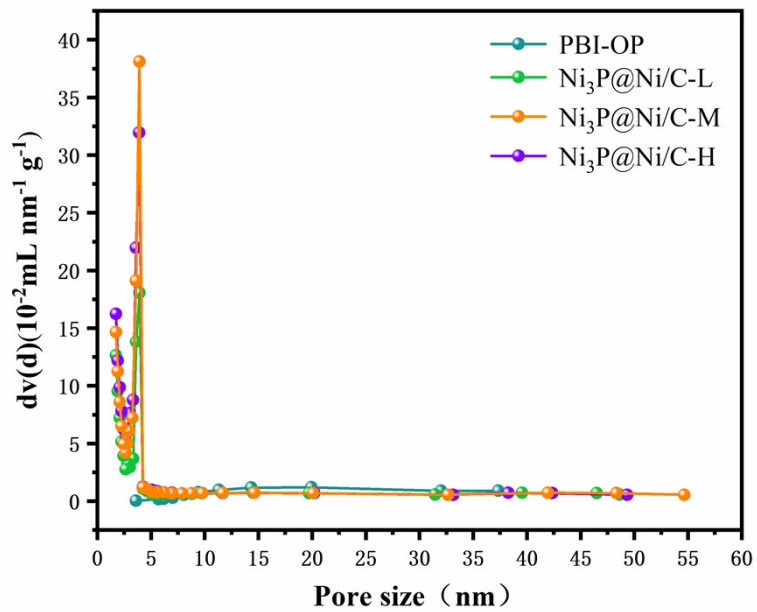

**Figure S3.** The pore size distribution curves of PBI-OP and  $\text{Ni}_3\text{P@Ni/CNP-L}$ ,  $\text{Ni}_3\text{P@Ni/CNP-M}$ , and  $\text{Ni}_3\text{P@Ni/CNP-H}$ .

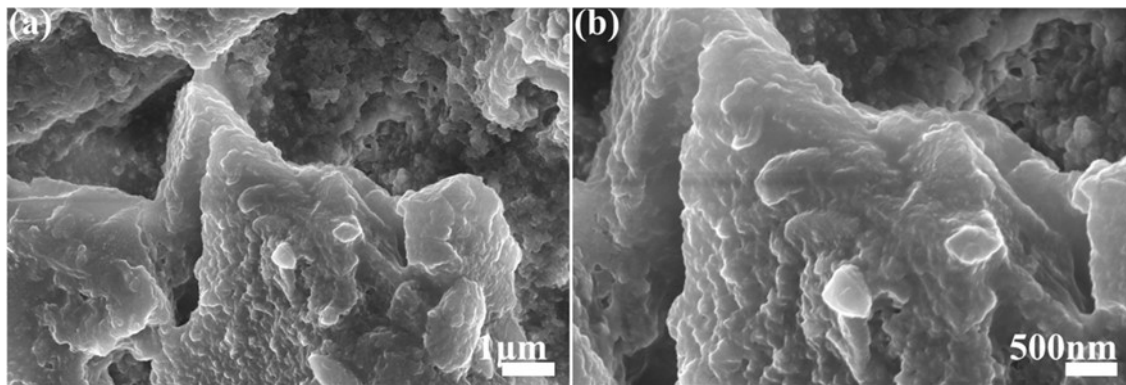

**Figure S4.** Magnified SEM images of Ni/PBI-OP.

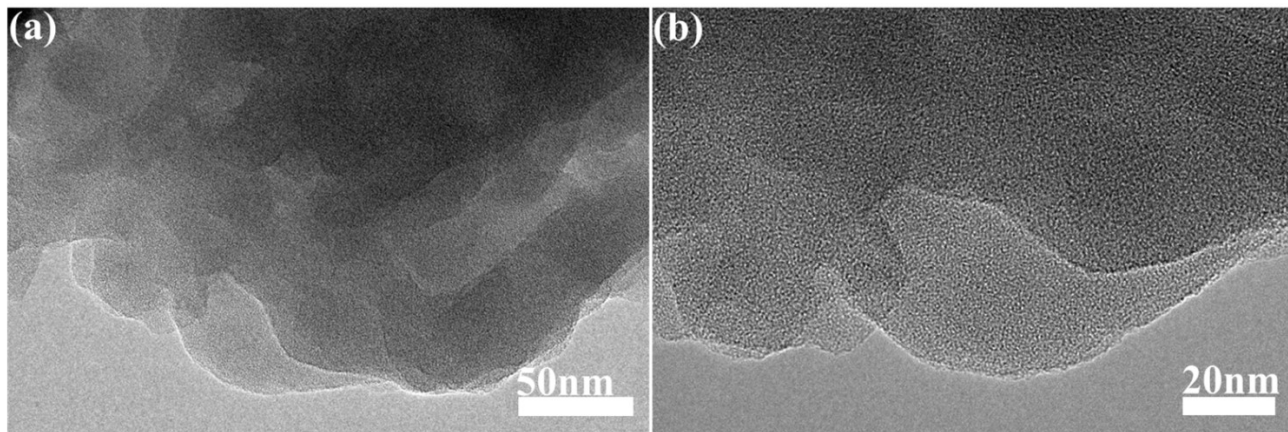

**Figure S5.** (a) TEM image and (b) HRTEM images of PBI-OP.

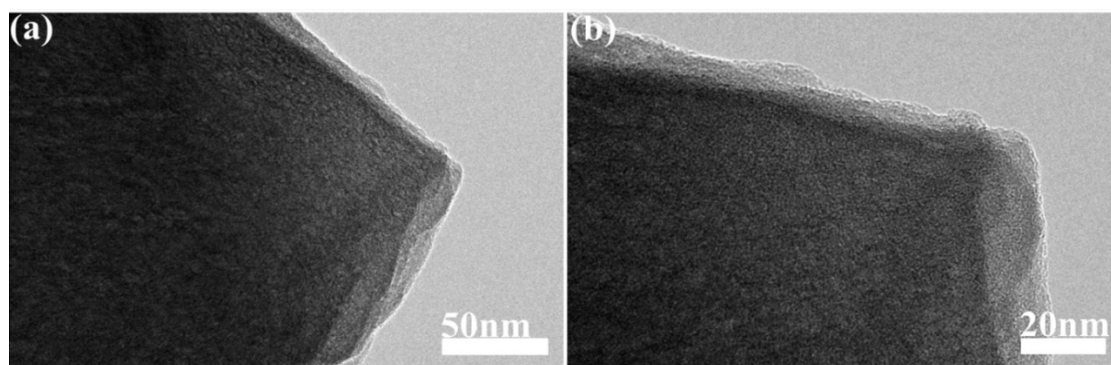

**Figure S6.** (a) TEM image and (b) HRTEM images of Ni/PBI-OP Precursor.

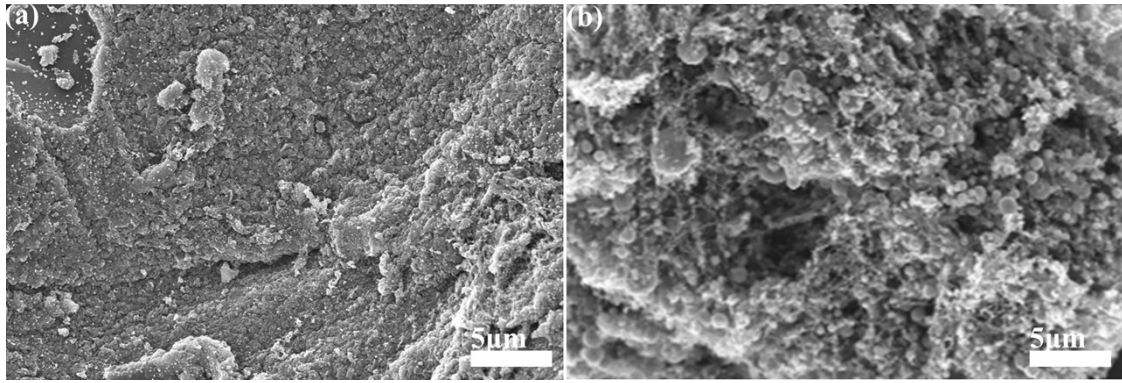

**Figure S7.** Magnified SEM images of (a)  $\text{Ni}_3\text{P@Ni/CNP-L}$  and (b)  $\text{Ni}_3\text{P@Ni/CNP-H}$ .

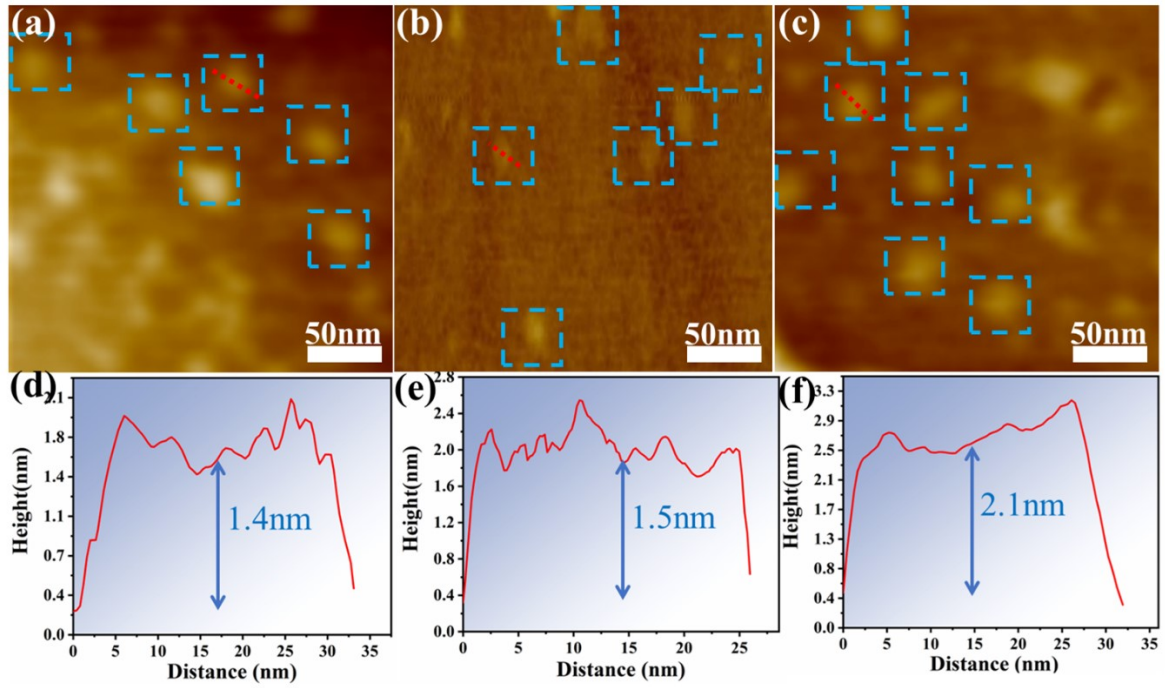

**Figure S8.** AFM image of (a) Ni<sub>3</sub>P@Ni/CNP-L, (b) Ni<sub>3</sub>P@Ni/CNP-M, (c) Ni<sub>3</sub>P@Ni/CNP-H, and Height contour at the red dashed line of (d) Ni<sub>3</sub>P@Ni/CNP-L, (e) Ni<sub>3</sub>P@Ni/CNP-M, (f) Ni<sub>3</sub>P@Ni/CNP-H.

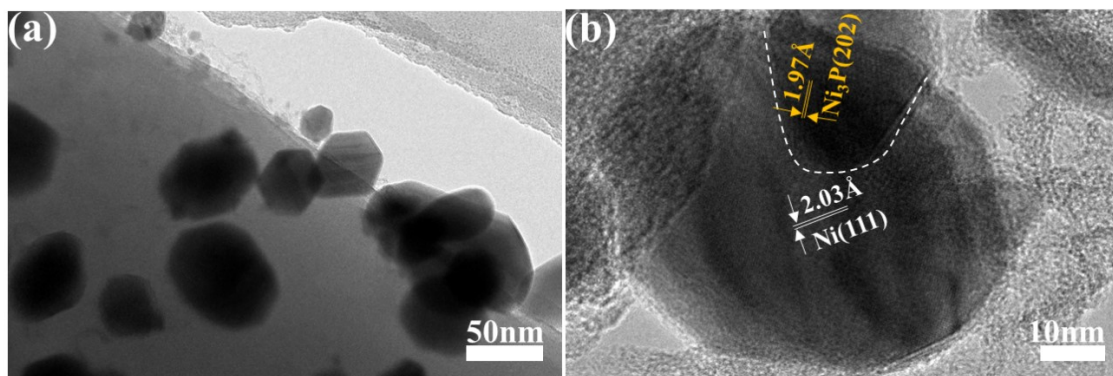

**Figure S9.** (a) TEM image, (b) HRTEM images of Ni<sub>3</sub>P@Ni/CNP-L.



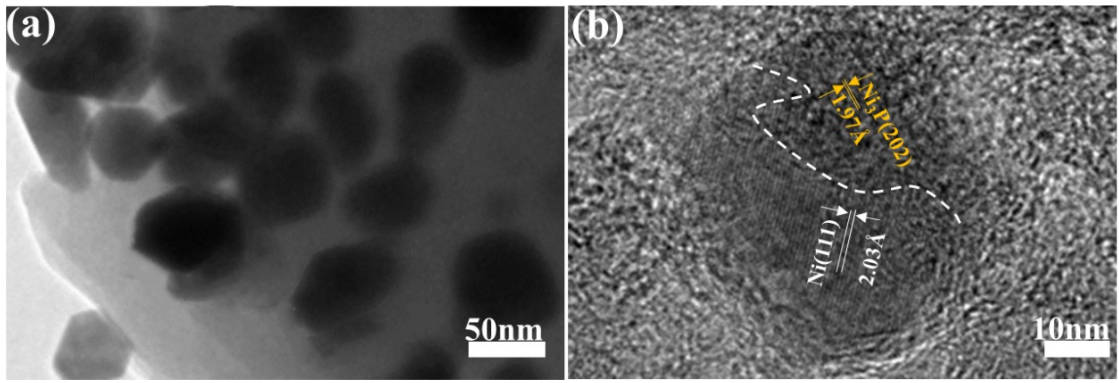

**Figure S10.** (a) TEM image, (b) HRTEM images of  $\text{Ni}_3\text{P}@Ni/\text{CNP-H}$ .

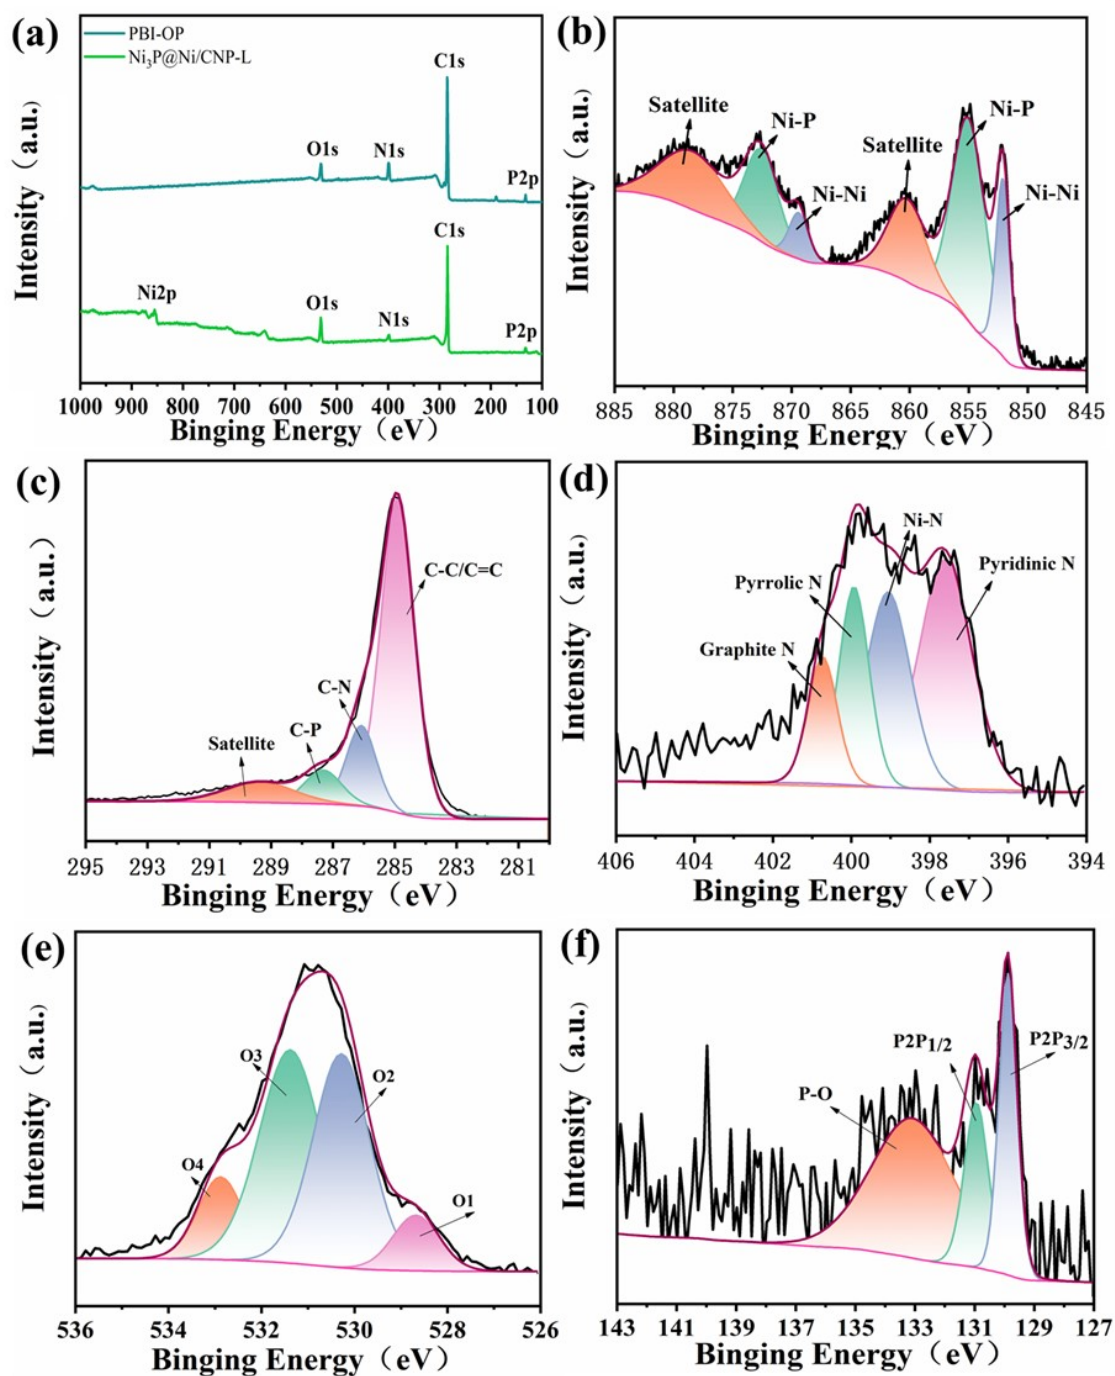

**Figure S11** (a) XPS survey, (b) Ni2p, (c) C1s, (d) N1s, (e) O1s, and (f) P2p spectrums of  $\text{Ni}_3\text{P}@Ni/\text{CNP-L}$ .

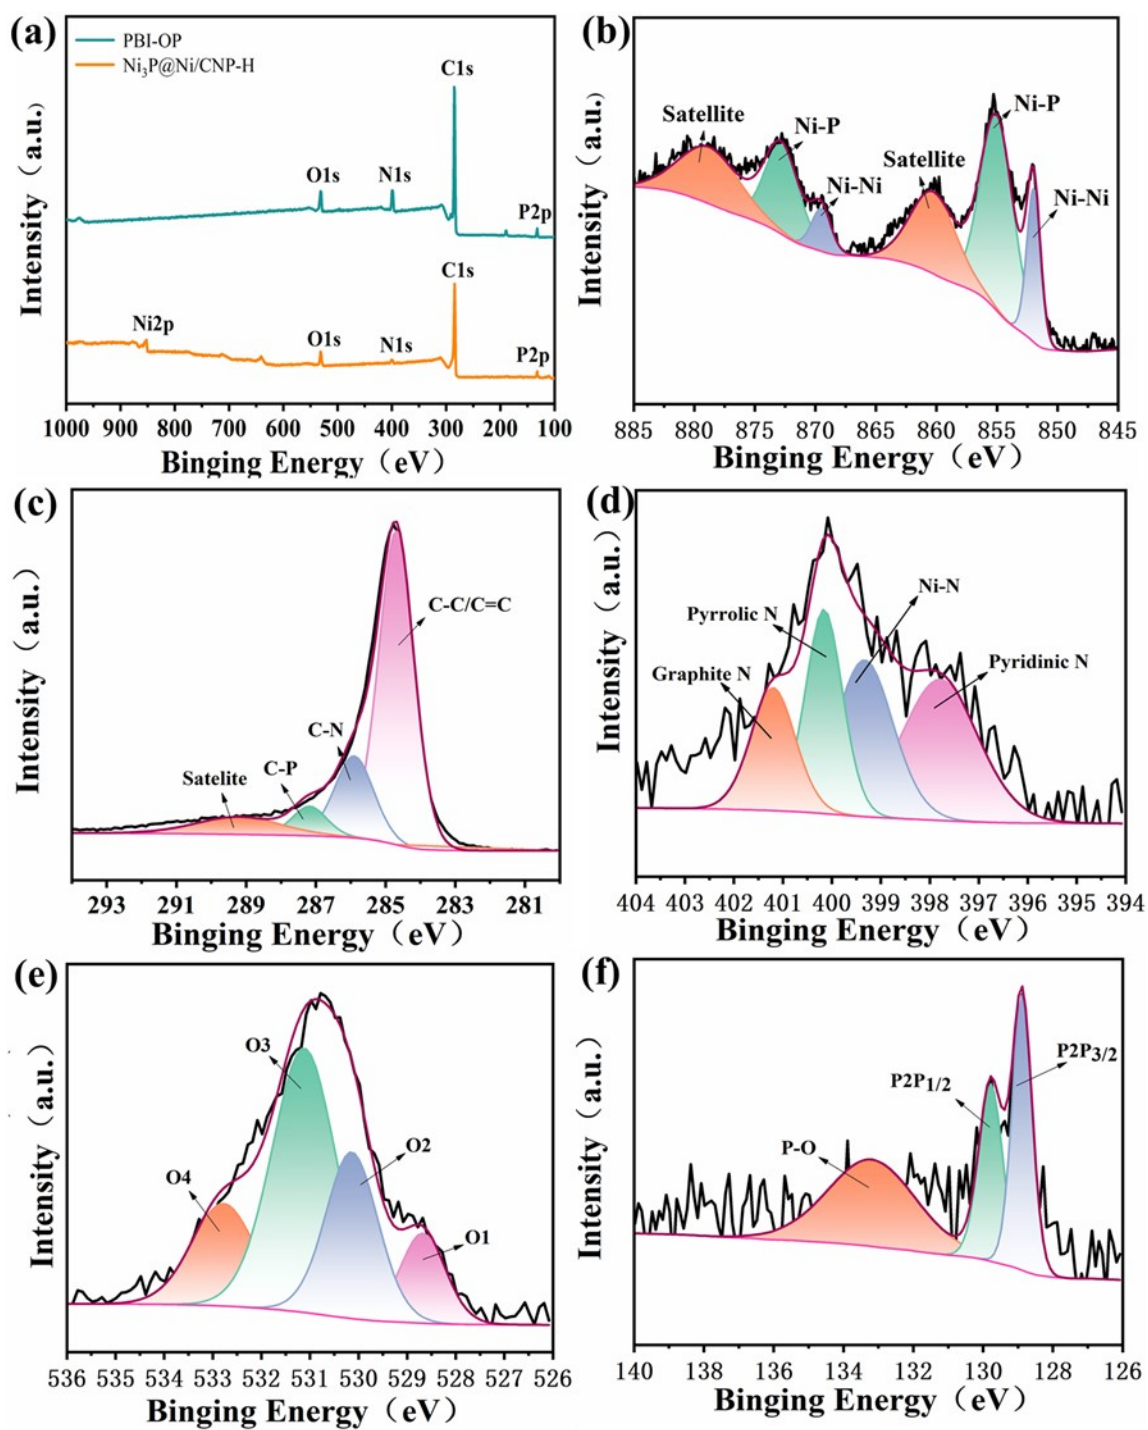

**Figure S12.** (a) XPS survey, (b)  $\text{Ni}2\text{p}$ , (c)  $\text{C}1\text{s}$ , (d)  $\text{N}1\text{s}$ , (e)  $\text{O}1\text{s}$ , and (f)  $\text{P}2\text{p}$  spectrums of  $\text{Ni}_3\text{P}@Ni/\text{CNP-H}$ .

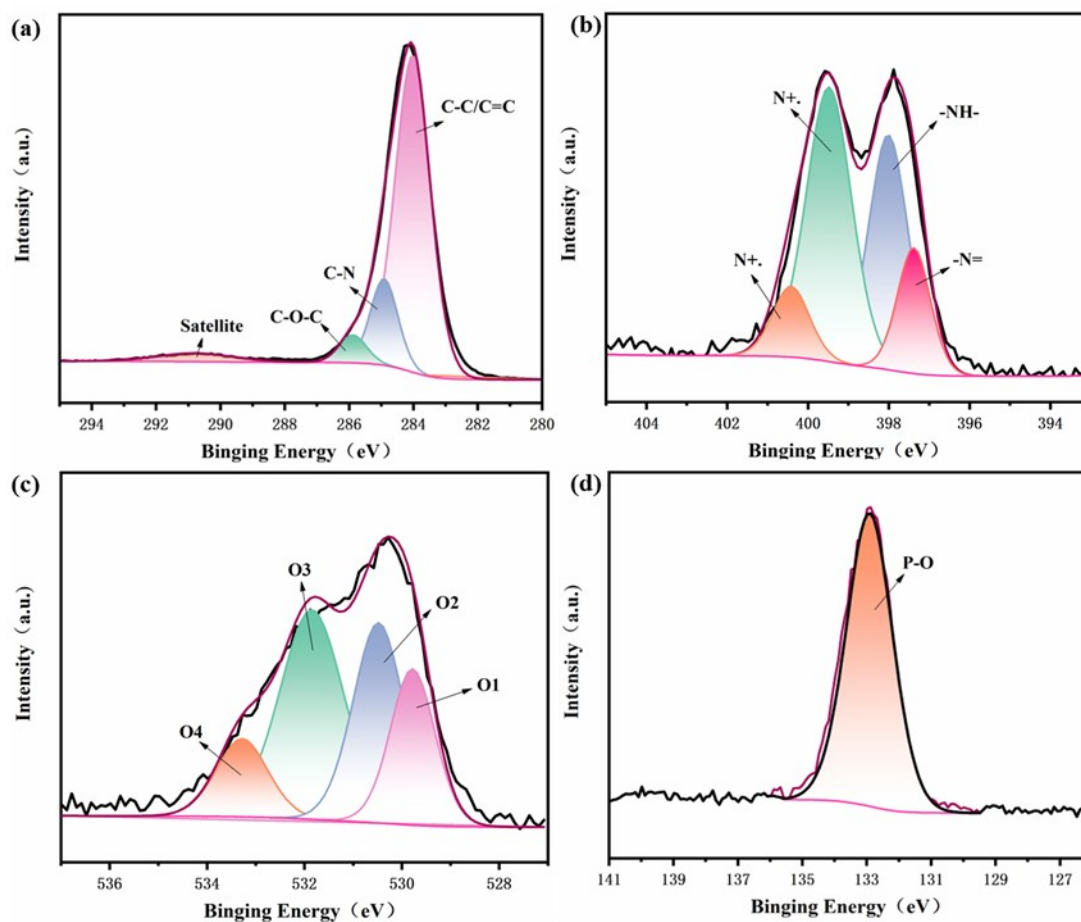

**Figure S13.** The XPS (a) C1s, (b)N1s, (c) O1s and (d) P2p spectrum of PBI-OP.

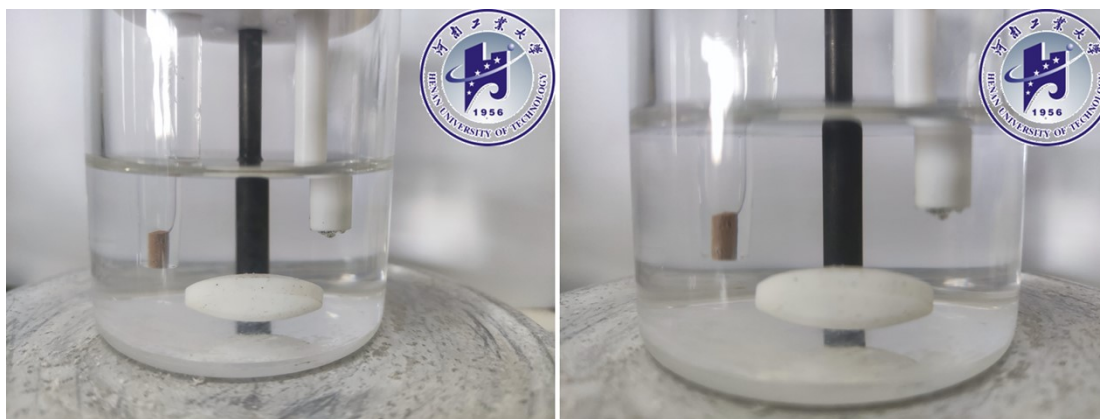

**Figure S14.** In real electrolytic cell  $\text{Ni}_3\text{P@Ni/CNP}$  electrocatalyst.

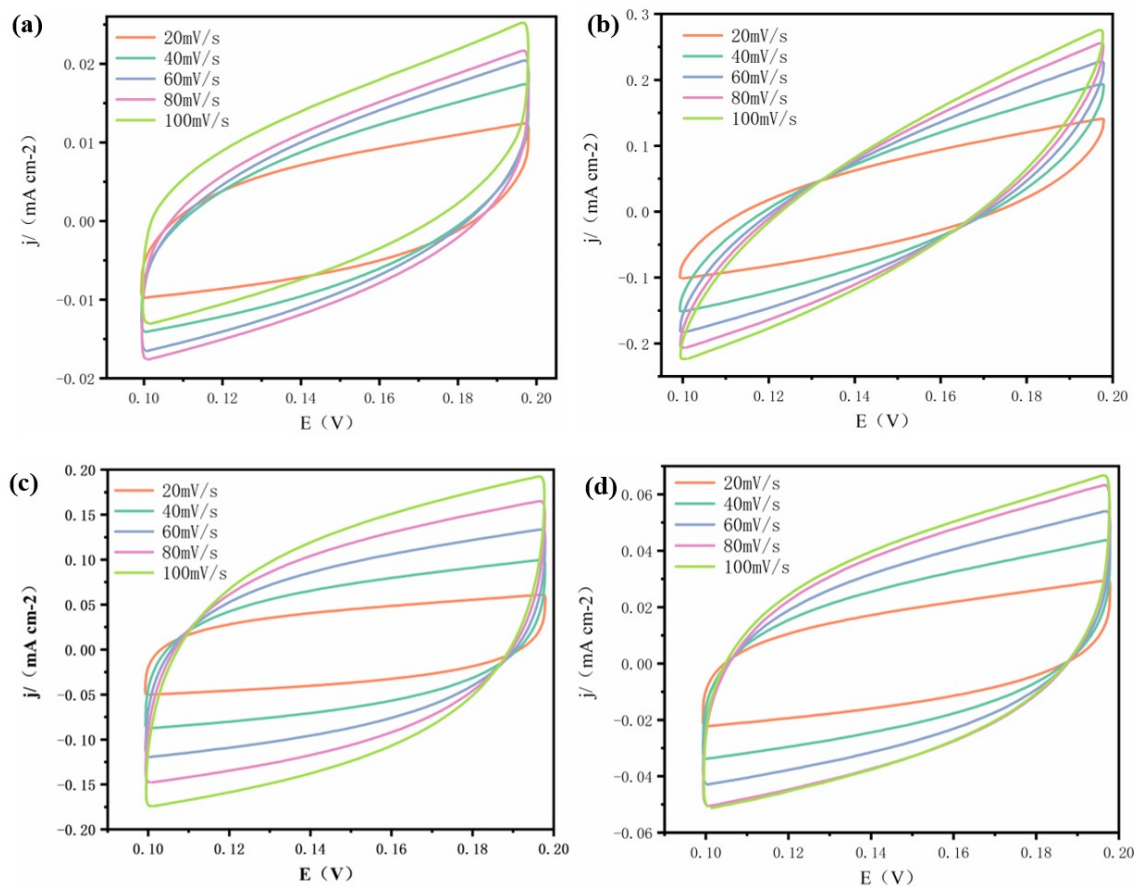

**Figure S15.** CV curves of (a)PBI-OP, (b) Ni<sub>3</sub>P@Ni/CNP-L, (c) Ni<sub>3</sub>P@Ni/CNP-M, and (d) Ni<sub>3</sub>P@Ni/CNP-H.

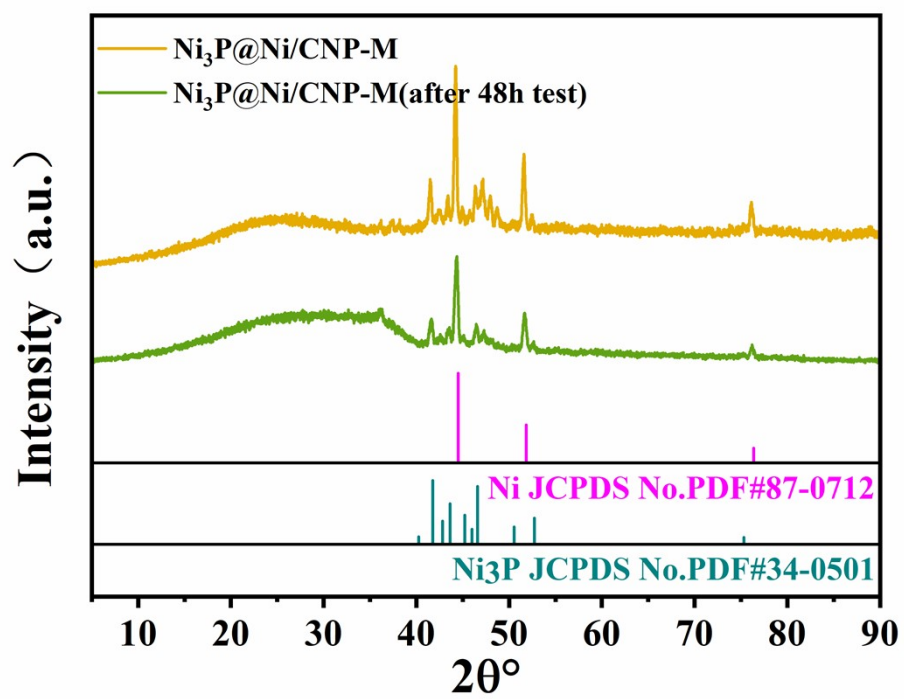

**Figure S16.** XRD pattern of Ni<sub>3</sub>P@Ni/CNP-M after 48h test.

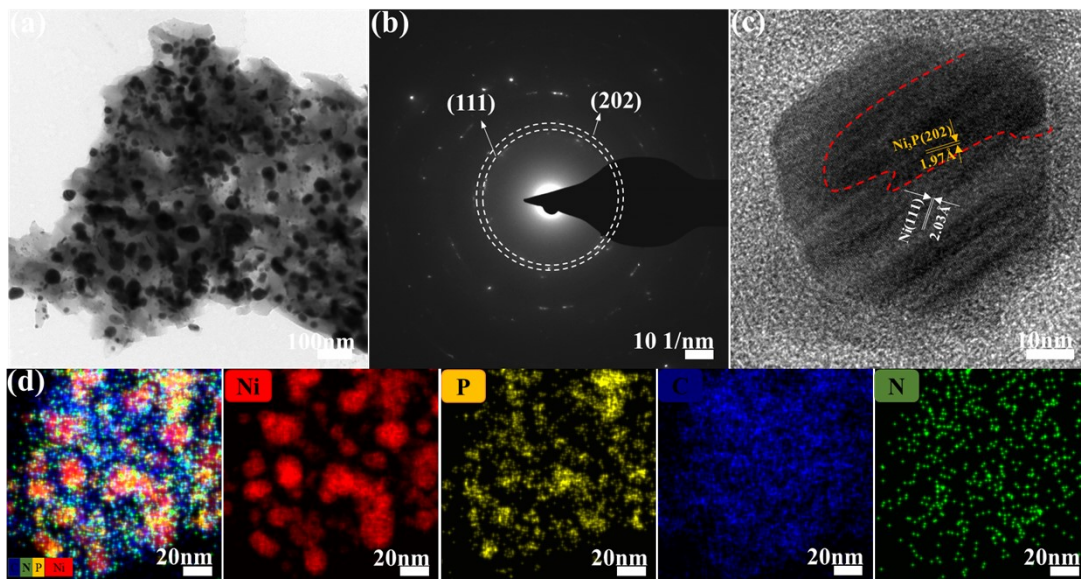

Figure S17. TEM of  $\text{Ni}_3\text{P}@Ni/\text{CNP-M}$  after 48h test.



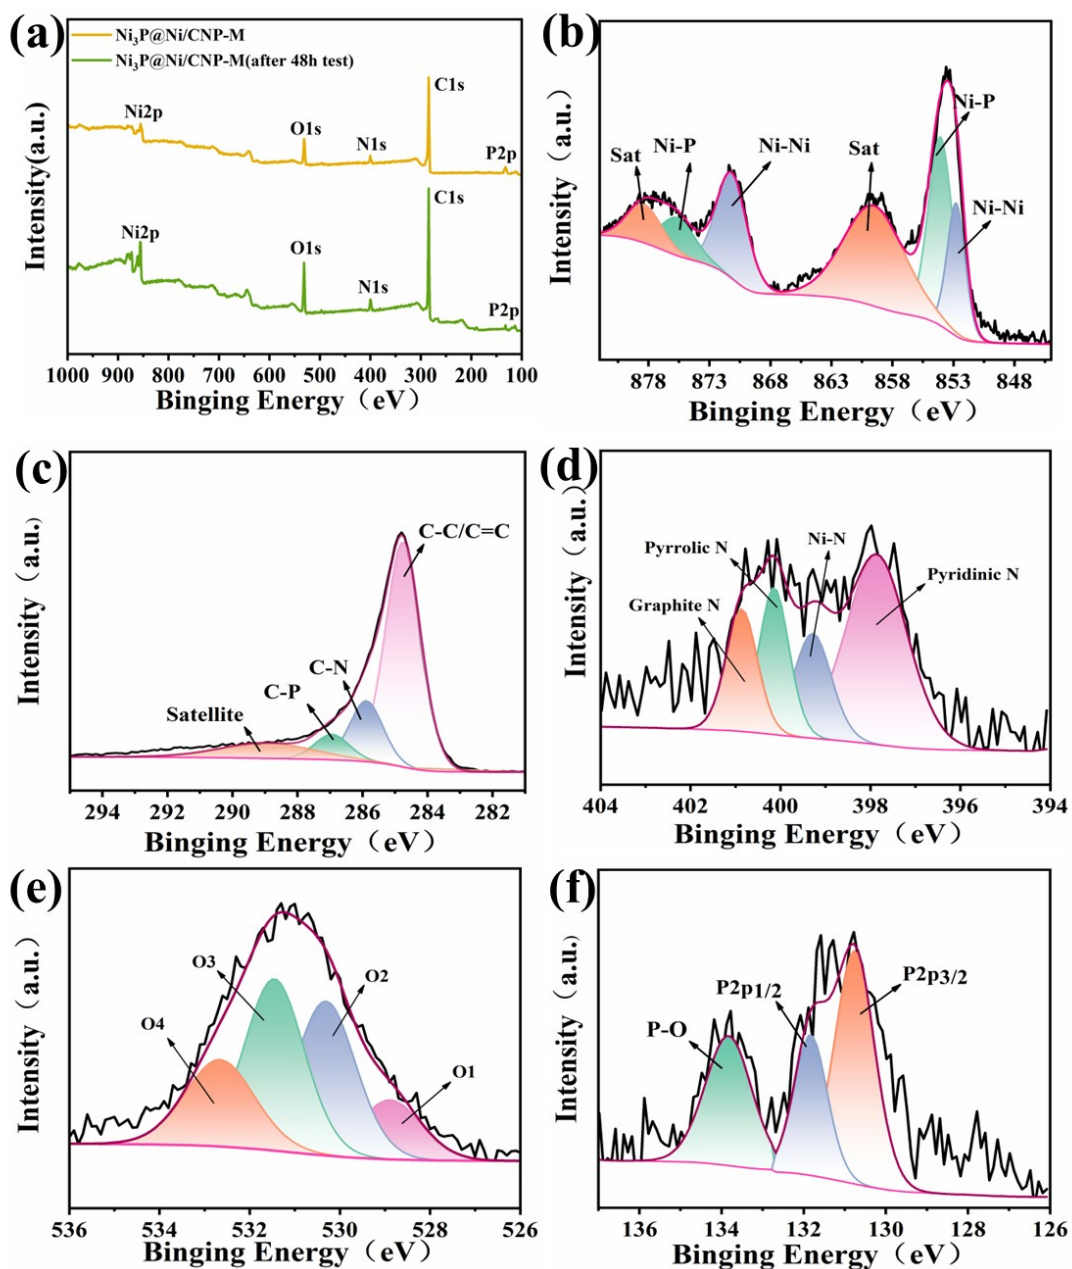

**Figure S18.** (a) XPS survey, (b) Ni2p, (c) C1s, (d) N1s, (e) O1s, and (f) P2p spectrums of  $\text{Ni}_3\text{P}@Ni/\text{CNP-M}$  after 48h test.

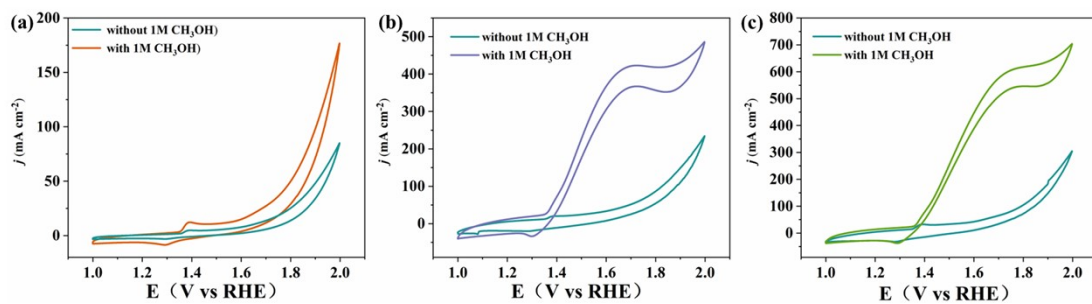

**Figure S19.** CV curves in 1M KOH before and after addition of 1 M CH<sub>3</sub>OH of (a) PBI-OP, (b) Ni<sub>3</sub>P@Ni/CNP-L and (c) Ni<sub>3</sub>P@Ni/CNP-H.

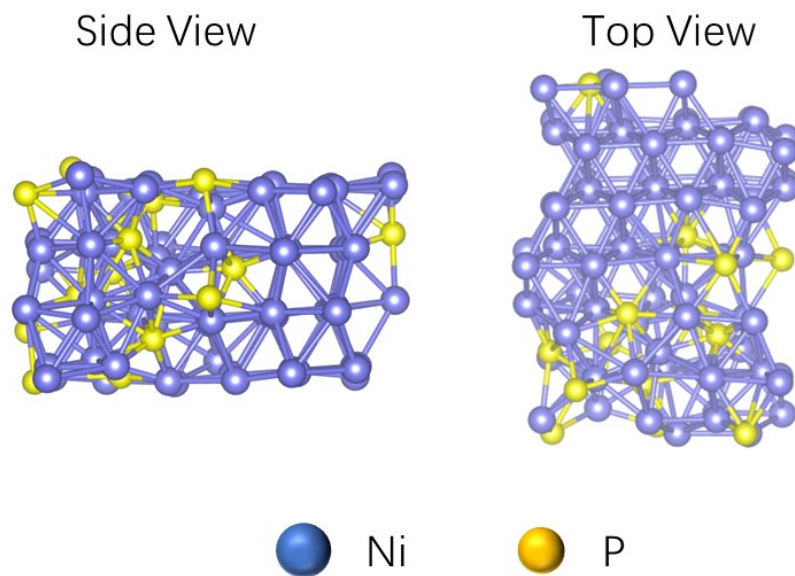

**Figure S20.** The optimized structure of Ni<sub>3</sub>P@Ni, side view(left); top view(right).  
(lattice parameters  $a = 9.44 \text{ \AA}$ ,  $b = 12.66 \text{ \AA}$ ,  $c = 27.30 \text{ \AA}$ ,  $\alpha = 90^\circ$ ,  $\beta = 90^\circ$ ,  $\gamma = 90^\circ$ ).

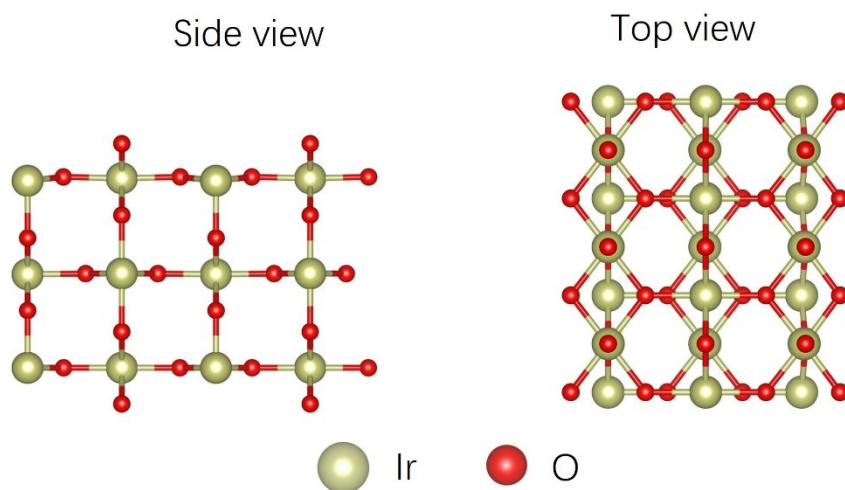

**Figure S21.** The optimized structure of IrO<sub>2</sub>, side view(left); top view(right). (Lattice parameters  $a = 9.56 \text{ \AA}$ ,  $b = 12.82 \text{ \AA}$ ,  $c = 23.87 \text{ \AA}$ ,  $\alpha = 90^\circ$ ,  $\beta = 90^\circ$ ,  $\gamma = 90^\circ$ ).

**Table S1.** The surface area, total pore volume and pore size of PBI-OP, Ni<sub>3</sub>P@Ni/CNP-L, Ni<sub>3</sub>P@Ni/CNP-M, and Ni<sub>3</sub>P@Ni/CNP-H.

| <b>Electrocatalyst</b>          | <b>BET surface area<br/>(m<sup>2</sup> g<sup>-1</sup>)</b> | <b>Pore volume<br/>(cm<sup>3</sup> g<sup>-1</sup>)</b> | <b>Pore size (nm)</b> |
|---------------------------------|------------------------------------------------------------|--------------------------------------------------------|-----------------------|
| <b>PBI-OP</b>                   | 12.03                                                      | 0.023                                                  | 7.60                  |
| <b>Ni<sub>3</sub>P@Ni/CNP-L</b> | 345.60                                                     | 0.16                                                   | 1.91                  |
| <b>Ni<sub>3</sub>P@Ni/CNP-M</b> | <b>374.01</b>                                              | <b>0.18</b>                                            | <b>1.83</b>           |
| <b>Ni<sub>3</sub>P@Ni/CNP-H</b> | 370.29                                                     | 0.18                                                   | 1.93                  |

**Table S2** Elemental and ICP-OES analyses of Ni<sub>3</sub>P@Ni/CNP sample.

| sample                     | elemental analysis (%) |      |      | ICP-OES analysis (%) |      |
|----------------------------|------------------------|------|------|----------------------|------|
|                            | C                      | N    | O    | Ni                   | P    |
| Ni <sub>3</sub> P@Ni/CNP-L | 41.06                  | 1.16 | 3.53 | 47.82                | 6.33 |
| Ni <sub>3</sub> P@Ni/CNP-M | 40.20                  | 1.35 | 3.70 | 48.28                | 6.31 |
| Ni <sub>3</sub> P@Ni/CNP-H | 40.31                  | 2.07 | 3.45 | 48.03                | 6.09 |

**Table S3.** The XPS peak separation ratio of N1s for Ni<sub>3</sub>P@Ni/CNP-L, Ni<sub>3</sub>P@Ni/CNP-M and Ni<sub>3</sub>P@Ni/CNP-H.

| Electrocatalyst                  | Pyridinic N  | Ni-N          | Pyrrolic N    | Graphite N    |
|----------------------------------|--------------|---------------|---------------|---------------|
| Ni <sub>3</sub> P@Ni/CNP -L      | 40.15%       | 21.76%        | 19.5%         | 12.05%        |
| <b>Ni<sub>3</sub>P@Ni/CNP -M</b> | <b>43.1%</b> | <b>28.31%</b> | <b>11.45%</b> | <b>17.14%</b> |
| Ni <sub>3</sub> P@Ni/CNP -H      | 32.81%       | 27.33%        | 23.19%        | 14.9%         |

**Table S4.** Comparison of electrocatalytic OER activities of Ni<sub>3</sub>P@Ni/C-M with similar state-of-the-art OER catalysts.

|                                                    | Electrolyte | $j$<br>(mA cm <sup>-2</sup> ) | $\eta$<br>(mV) | Tafel<br>slope<br>(mV dec <sup>-1</sup> ) | Ref.      |
|----------------------------------------------------|-------------|-------------------------------|----------------|-------------------------------------------|-----------|
| Ni/Ni <sub>2</sub> P@N-CNF                         | 1.0 M KOH   | 10                            | 285            | 52.2                                      | [22]      |
| N-Ni <sub>3</sub> P-Ni/N-CNTs/NF                   | 1.0 M KOH   | 10                            | 270            | 98.59                                     | [23]      |
| Ni <sub>3</sub> P/MnOOH                            | 1.0 M KOH   | 10                            | 300            | 79.8                                      | [25]      |
| Ni <sub>2</sub> P/Co-NF                            | 1.0 M KOH   | 10                            | 316            | 81                                        | [27]      |
| NiFeP                                              | 1.0 M KOH   | 10                            | 277            | -                                         | [55]      |
| Ni/Ni <sub>3</sub> C                               | 1.0 M KOH   | 10                            | 350            | 57.6                                      | [56]      |
| Ni <sub>2</sub> P/NiCo <sub>2</sub> O <sub>4</sub> | 1.0 M KOH   | 10                            | 250            | 58                                        | [57]      |
| Ni <sub>2</sub> P/NPCM NCs                         | 1.0 M KOH   | 10                            | 255            | 57                                        | [58]      |
| Ni <sub>5</sub> P <sub>4</sub> NSs                 | 1.0 M KOH   | 10                            | 290            | 40                                        | [59]      |
| CNT@NiCoP/C                                        | 1.0 M KOH   | 10                            | 297            | 57.35                                     | [60]      |
| Co <sub>2</sub> P/Ni <sub>2</sub> P@NF             | 1.0 M KOH   | 10                            | 310            | 69.9                                      | [61]      |
| Fe <sub>2</sub> P/Ni <sub>2</sub> P HS/NF          | 1.0 M KOH   | 10                            | 182            | 56                                        | [62]      |
| Fe-CoNiP                                           | 1.0 M KOH   | 10                            | 280            | 99.1                                      | [63]      |
| NiFeP@CNT                                          | 1.0 M KOH   | 10                            | 254            | 36.1                                      | [64]      |
| NiFeP@GNS                                          | 1.0 M KOH   | 10                            | 211            | 43                                        | [65]      |
| NFP@NG                                             | 1.0 M KOH   | 10                            | 295            | 57.7                                      | [66]      |
| NiP <sub>2</sub> @FeP@CNT                          | 1.0 M KOH   | 10                            | 261            | 44                                        | [67]      |
| FeP/Ni <sub>2</sub> P@CNT                          | 1.0 M KOH   | 10                            | 240            | 69.95                                     | [68]      |
| NiMn-P                                             | 1.0 M KOH   | 10                            | 190            | 38                                        | [69]      |
| Ni <sub>3</sub> P@Ni/C-M                           | 1.0 M KOH   | 10                            | 239            | 52                                        | This work |



**Table S5** Elemental and ICP-OES analyses of Ni<sub>3</sub>P@Ni/CNP-M before and after 48h test.

| sample                                         | elemental analysis (%) |      |      | ICP-OES analysis (%) |      |
|------------------------------------------------|------------------------|------|------|----------------------|------|
|                                                | C                      | N    | O    | Ni                   | P    |
| Ni <sub>3</sub> P@Ni/CNP-M                     | 40.20                  | 1.35 | 3.70 | 48.28                | 6.31 |
| Ni <sub>3</sub> P@Ni/CNP-M<br>(after 48h test) | 40.09                  | 1.78 | 2.74 | 48.32                | 6.24 |

**Table S6.** EIS fitting parameters to the equivalent electric circuit for the OER.

|                                                  | <b>Ni<sub>3</sub>P@Ni/CNP-L</b> | <b>Ni<sub>3</sub>P@Ni/CNP-M</b> | <b>Ni<sub>3</sub>P@Ni/CNP-H</b> |
|--------------------------------------------------|---------------------------------|---------------------------------|---------------------------------|
| <b>Rs (<math>\Omega\cdot\text{cm}^2</math>)</b>  | 2.348                           | 1.098                           | 2.379                           |
| <b>CPE (<math>\Omega\cdot\text{cm}^2</math>)</b> | 3.1589E-5                       | 2.7989E-5                       | 2.8631E-5                       |
| <b>Rct (<math>\Omega\cdot\text{cm}^2</math>)</b> | 10.92                           | 5.367                           | 9.544                           |
